# Supplementary material for: Non-invasive diagnosis of Crohn's disease based on SERS combined with PCA-SVM
Source: Royal Society of Chemistry journal article supplement (doi:10.1039/d1ay01377g), 2021-01-01
Supplement: d1ay01377g1.pdf [file d1ay01377g1.pdf]

## Supplemental Material

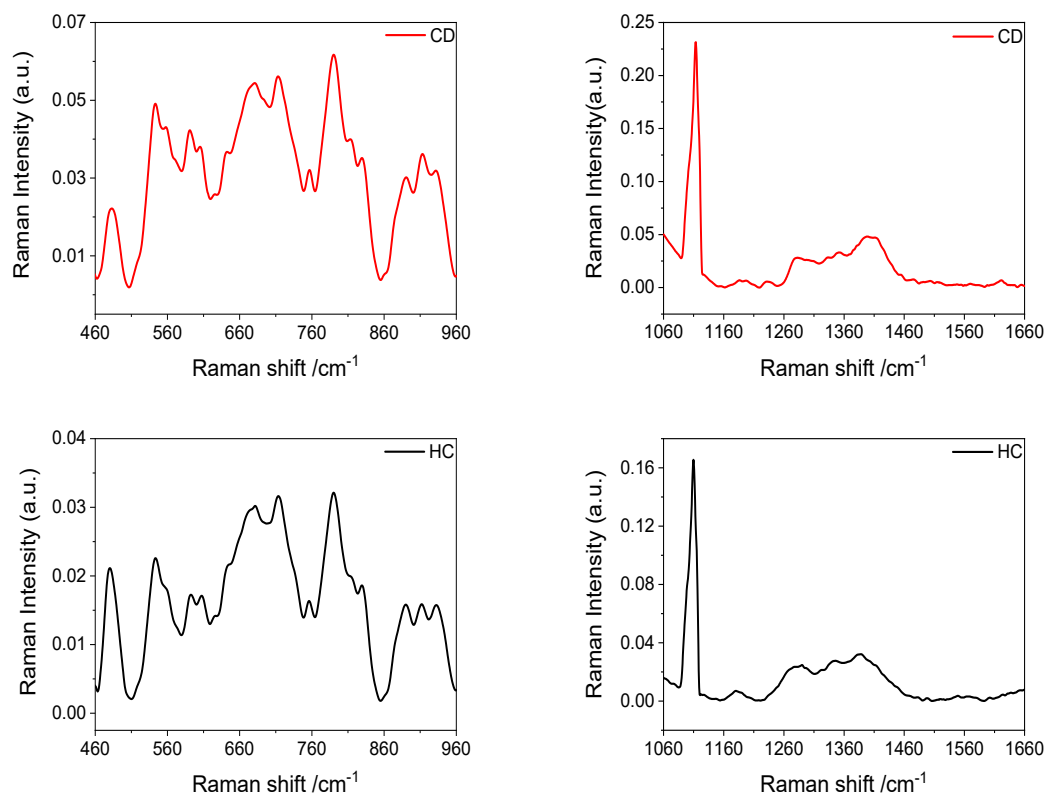

Figure S1: Two examples (1 CD + 1 HC) of the average spectra acquired from each sample

Table S1: Tests for normality within disease status (CD/HC). Wilcoxon test between means of Raman intensities at 11 main peaks of CD/HC

| Peak (cm <sup>-1</sup> ) | Kolmogorov-Smirnov test |         | Shapiro-Wilk test |         | Wilcoxon test |
|--------------------------|-------------------------|---------|-------------------|---------|---------------|
|                          | CD                      | HC      | CD                | HC      |               |
| 543                      | <0.0001                 | 0.012   | <0.0001           | 0.034   | <0.0001       |
| 559                      | <0.0001                 | 0.029   | <0.0001           | 0.027   | <0.0001       |
| 591                      | 0.002                   | 0.192   | 0.002             | 0.057   | <0.0001       |
| 606                      | 0.005                   | 0.056   | 0.132             | 0.023   | <0.0001       |
| 813                      | 0.057                   | 0.2     | 0.005             | 0.094   | <0.0001       |
| 1110                     | <0.0001                 | 0.2     | <0.0001           | 0.004   | <0.0001       |
| 1298                     | 0.001                   | 0.166   | <0.0001           | 0.454   | <0.0001       |
| 1352                     | 0.029                   | 0.093   | 0.046             | 0.096   | <0.0001       |
| 1472                     | <0.0001                 | <0.0001 | <0.0001           | <0.0001 | <0.0001       |
| 1622                     | <0.0001                 | 0.2     | <0.0001           | 0.026   | <0.0001       |
| 1643                     | <0.0001                 | 0.2     | <0.0001           | 0.009   | 0.014         |

Table S2: Assignment of the main Raman peaks observed in human urine

| Peak Position<br>(cm <sup>-1</sup> ) | Assignment                                                 |
|--------------------------------------|------------------------------------------------------------|
| 543                                  | Cholesterol                                                |
| 559                                  | Nucleic acid                                               |
| 591                                  | Serine                                                     |
| 606                                  | Cholesterol                                                |
| 757                                  | Tryptophan                                                 |
| 813                                  | L-serine and glutathione                                   |
| 1110                                 | C-C vibration mode of the gauche-bonded chain              |
| 1280                                 | Protein amide III                                          |
| 1298                                 | CH <sub>2</sub> bending of lipids and protein              |
| 1323                                 | Lipids                                                     |
| 1352                                 | Nucleic acid                                               |
| 1472                                 | CH <sub>2</sub> bending of lipids and protein              |
| 1622                                 | C=C stretching mode of tyrosine and tryptophan             |
| 1643                                 | C=C stretching mode of lipids and the protein amide I band |

Table S3: The combined effects of age, sex (female/male) and disease status (CD/HC) on the intensities at 11 main Raman peaks analysed by the generalized linear model

| Peak (cm <sup>-1</sup> ) | Parameter                 | p-value |
|--------------------------|---------------------------|---------|
| 543                      | [status CD] - [status HC] | 0.007   |
|                          | [sex female] - [sex male] | 0.298   |
|                          | age                       | 0.936   |
| 559                      | [status CD] - [status HC] | 0.016   |
|                          | [sex female] - [sex male] | 0.189   |
|                          | age                       | 0.965   |
| 591                      | [status CD] - [status HC] | 0.017   |
|                          | [sex female] - [sex male] | 0.346   |
|                          | age                       | 0.968   |
| 606                      | [status CD] - [status HC] | 0.040   |
|                          | [sex female] - [sex male] | 0.603   |
|                          | age                       | 0.934   |
| 813                      | [status CD] - [status HC] | 0.022   |
|                          | [sex female] - [sex male] | 0.232   |
|                          | age                       | 0.964   |
| 1110                     | [status CD] - [status HC] | 0.011   |
|                          | [sex female] - [sex male] | 0.800   |
|                          | age                       | 0.521   |
| 1298                     | [status CD] - [status HC] | <0.0001 |
|                          | [sex female] - [sex male] | 0.951   |
|                          | age                       | 0.531   |
| 1352                     | [status CD] - [status HC] | 0.006   |
|                          | [sex female] - [sex male] | 0.643   |
|                          | age                       | 0.821   |
| 1472                     | [status CD] - [status HC] | 0.015   |
|                          | [sex female] - [sex male] | 0.553   |
|                          | age                       | 0.503   |
| 1622                     | [status CD] - [status HC] | <0.0001 |
|                          | [sex female] - [sex male] | 0.906   |
|                          | age                       | 0.579   |
| 1643                     | [status CD] - [status HC] | 0.015   |
|                          | [sex female] - [sex male] | 0.822   |
|                          | age                       | 0.383   |

Table S4: Eigenvalue, percentage of variance and the cumulative percentage of variance of the first 20 principal components identified by the PCA analysis for CD/HC

| PC number | Eigenvalue  | Percentage of Variance (%) | Cumulative (%) |
|-----------|-------------|----------------------------|----------------|
| 1         | 0.10455     | 34.89442                   | 34.89442       |
| 2         | 0.06122     | 20.4313                    | 55.32573       |
| 3         | 0.03362     | 11.22009                   | 66.54582       |
| 4         | 0.02577     | 8.60148                    | 75.14729       |
| 5         | 0.01678     | 5.59969                    | 80.74698       |
| 6         | 0.01498     | 5.00067                    | 85.74765       |
| 7         | 0.01246     | 4.15861                    | 89.90626       |
| 8         | 0.00823     | 2.74821                    | 92.65447       |
| 9         | 0.0046      | 1.53513                    | 94.18959       |
| 10        | 0.00325     | 1.08528                    | 95.27487       |
| 11        | 0.00286     | 0.9546                     | 96.22947       |
| 12        | 0.00157     | 0.52322                    | 96.75269       |
| 13        | 0.0011      | 0.36657                    | 97.11926       |
| 14        | 0.000933732 | 0.31164                    | 97.4309        |
| 15        | 0.000768392 | 0.25646                    | 97.68736       |
| 16        | 0.000698389 | 0.23309                    | 97.92046       |
| 17        | 0.000570682 | 0.19047                    | 98.11093       |
| 18        | 0.000525439 | 0.17537                    | 98.2863        |
| 19        | 0.000443079 | 0.14788                    | 98.43418       |
| 20        | 0.000388619 | 0.12971                    | 98.56389       |

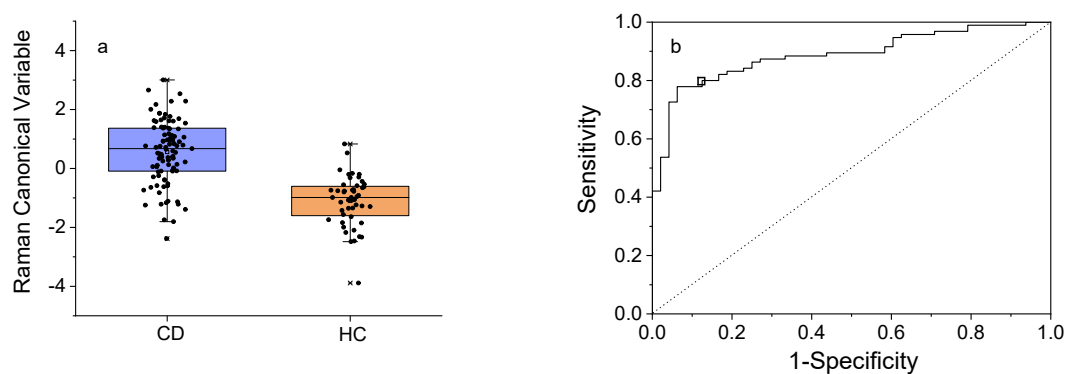

Figure S2: (A) Box plot showing the Raman canonical variable obtained for CD/HC; (B) ROC curve

Table S5: Tests for normality within disease status (aCD/HC). Wilcoxon test between means of Raman intensities at 13 main peaks of aCD/HC

| Peak<br>(cm <sup>-1</sup> ) | Kolmogorov-Smirnov<br>test |         | Shapiro-Wilk test |         | Wilcoxon<br>test |
|-----------------------------|----------------------------|---------|-------------------|---------|------------------|
|                             | aCD                        | HC      | aCD               | HC      |                  |
| 543                         | 0.012                      | 0.009   | 0.034             | <0.0001 | <0.0001          |
| 559                         | 0.079                      | 0.003   | 0.025             | 0.001   | <0.0001          |
| 591                         | 0.192                      | 0.015   | 0.057             | 0.011   | <0.0001          |
| 757                         | 0.200                      | 0.200   | 0.086             | 0.731   | 0.011            |
| 813                         | 0.200                      | 0.091   | 0.094             | 0.033   | 0.001            |
| 1110                        | 0.010                      | 0.200   | <0.0001           | 0.004   | 0.013            |
| 1280                        | 0.200                      | 0.200   | 0.003             | 0.578   | <0.0001          |
| 1298                        | 0.166                      | 0.200   | 0.454             | 0.001   | <0.0001          |
| 1323                        | 0.200                      | 0.200   | 0.038             | 0.163   | <0.0001          |
| 1352                        | 0.033                      | 0.200   | 0.036             | 0.063   | 0.001            |
| 1472                        | <0.0001                    | 0.089   | <0.0001           | 0.007   | 0.014            |
| 1622                        | 0.200                      | 0.004   | 0.031             | <0.0001 | <0.0001          |
| 1643                        | 0.200                      | <0.0001 | 0.009             | <0.0001 | 0.027            |

Table S6: The combined effects of age, sex (female/male) and disease status (aCD/HC) on the intensities at 13 main Raman peaks analysed by the generalized linear model

| Peak (cm <sup>-1</sup> ) | Parameter                  | p-value |
|--------------------------|----------------------------|---------|
| 543                      | [status aCD] - [status HC] | 0.008   |
|                          | [sex female] - [sex male]  | 0.152   |
|                          | age                        | 0.599   |
| 559                      | [status aCD] - [status HC] | 0.024   |
|                          | [sex female] - [sex male]  | 0.123   |
|                          | age                        | 0.699   |
| 591                      | [status aCD] - [status HC] | 0.015   |
|                          | [sex female] - [sex male]  | 0.259   |
|                          | age                        | 0.654   |
| 757                      | [status aCD] - [status HC] | 0.015   |
|                          | [sex female] - [sex male]  | 0.669   |
|                          | age                        | 0.615   |
| 813                      | [status aCD] - [status HC] | 0.002   |
|                          | [sex female] - [sex male]  | 0.349   |
|                          | age                        | 0.573   |
| 1110                     | [status aCD] - [status HC] | 0.008   |
|                          | [sex female] - [sex male]  | 0.817   |
|                          | age                        | 0.232   |
| 1280                     | [status aCD] - [status HC] | 0.004   |
|                          | [sex female] - [sex male]  | 0.443   |
|                          | age                        | 0.472   |
| 1298                     | [status aCD] - [status HC] | 0.004   |
|                          | [sex female] - [sex male]  | 0.383   |
|                          | age                        | 0.372   |
| 1323                     | [status aCD] - [status HC] | 0.032   |
|                          | [sex female] - [sex male]  | 0.324   |
|                          | age                        | 0.75    |
| 1352                     | [status aCD] - [status HC] | 0.024   |
|                          | [sex female] - [sex male]  | 0.453   |
|                          | age                        | 0.669   |
| 1472                     | [status aCD] - [status HC] | 0.037   |
|                          | [sex female] - [sex male]  | 0.985   |
|                          | age                        | 0.135   |
| 1622                     | [status aCD] - [status HC] | 0.001   |
|                          | [sex female] - [sex male]  | 0.694   |
|                          | age                        | 0.299   |
| 1643                     | [status aCD] - [status HC] | 0.010   |
|                          | [sex female] - [sex male]  | 0.620   |
|                          | age                        | 0.469   |

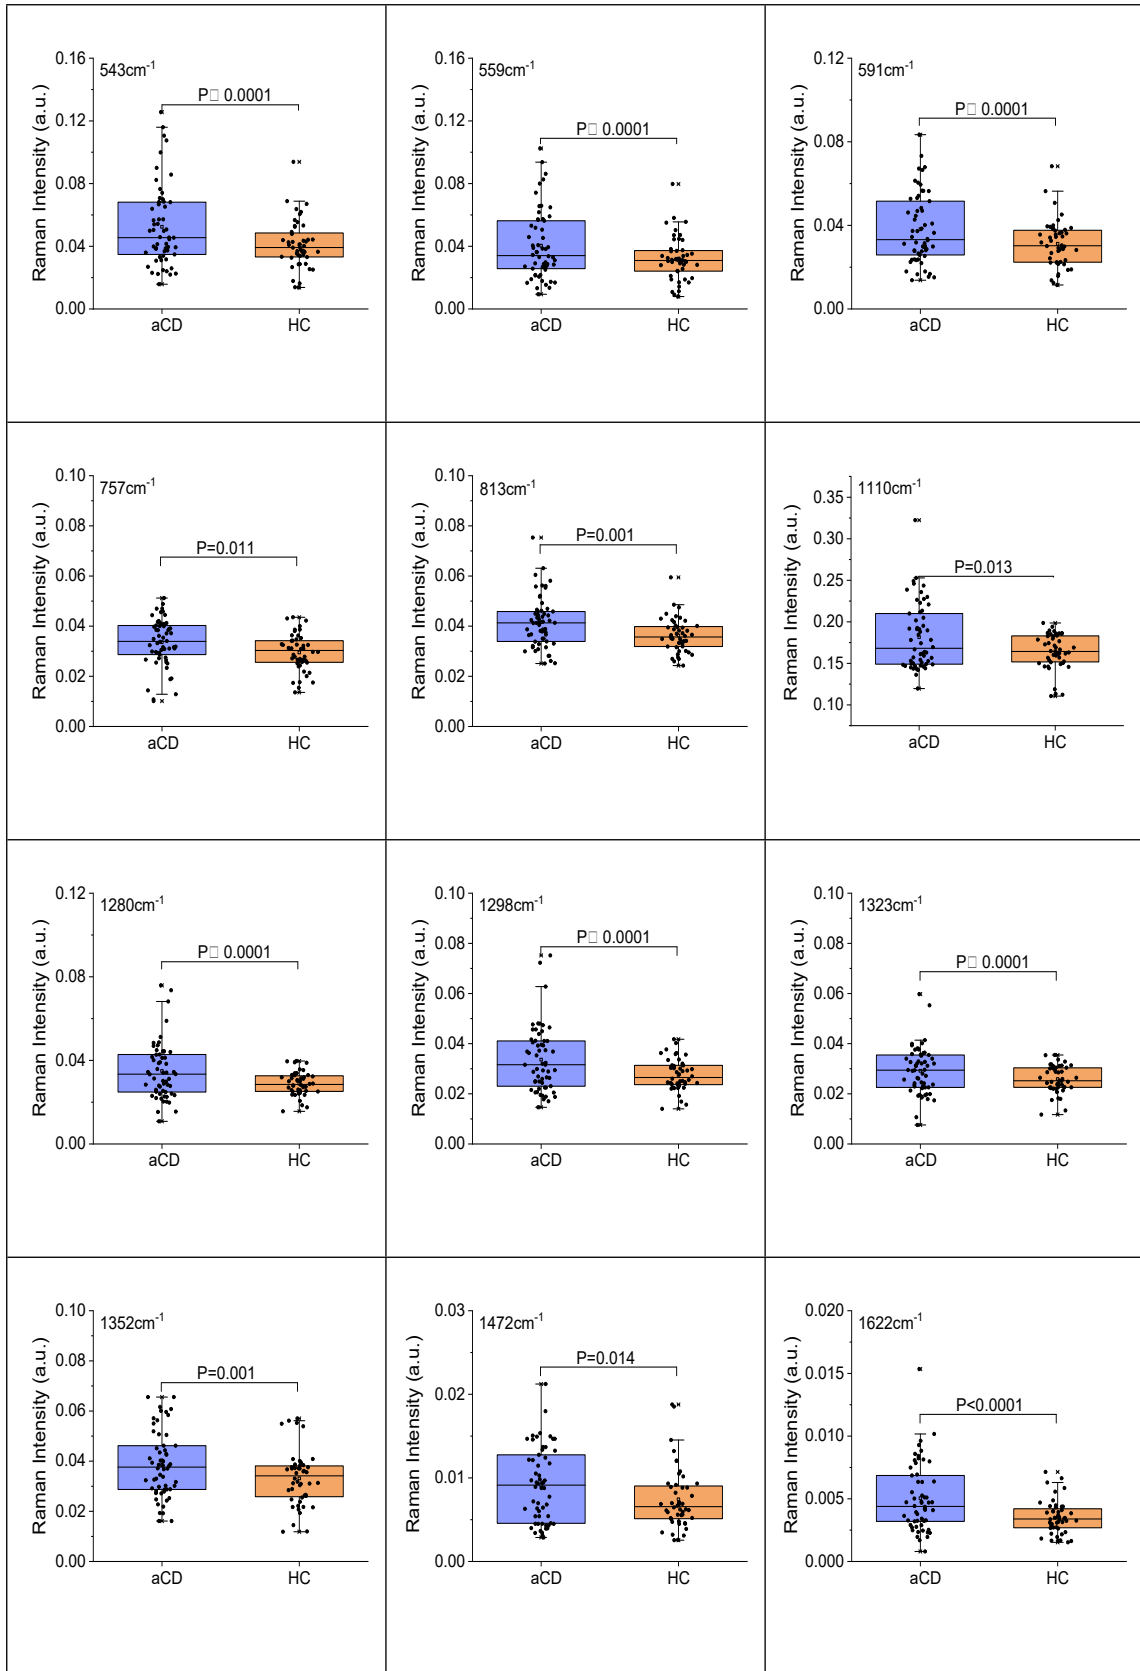

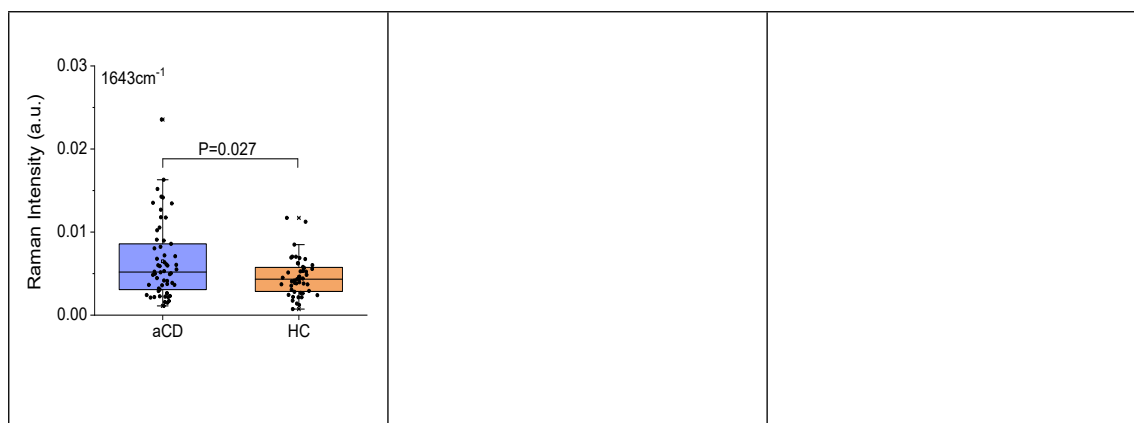

Figure S3: Box plots of the Raman intensities at 13 main Raman peaks in aCD/HC

Table S7: Eigenvalue, percentage of variance and the cumulative percentage of variance of the first 20 principal components identified by the PCA analysis for aCD/HC

| PC number | Eigenvalue | Percentage of Variance (%) | Cumulative (%) |
|-----------|------------|----------------------------|----------------|
| 1         | 0.10119    | 37.7101                    | 37.7101        |
| 2         | 0.04595    | 17.12467                   | 54.83477       |
| 3         | 0.03589    | 13.37359                   | 68.20836       |
| 4         | 0.02502    | 9.32306                    | 77.53142       |
| 5         | 0.01575    | 5.86843                    | 83.39985       |
| 6         | 0.01437    | 5.35506                    | 88.7549        |
| 7         | 0.00846    | 3.15153                    | 91.90643       |
| 8         | 0.00653    | 2.43394                    | 94.34037       |
| 9         | 0.00412    | 1.53503                    | 95.8754        |
| 10        | 0.00193    | 0.71886                    | 96.59425       |
| 11        | 1.47E-03   | 0.54941                    | 97.14366       |
| 12        | 1.01E-03   | 0.37547                    | 97.51913       |
| 13        | 8.29E-04   | 0.30887                    | 97.82801       |
| 14        | 6.64E-04   | 0.24733                    | 98.07533       |
| 15        | 6.08E-04   | 0.22673                    | 98.30206       |
| 16        | 4.85E-04   | 0.18071                    | 98.48277       |
| 17        | 4.39E-04   | 0.16357                    | 98.64635       |
| 18        | 3.49E-04   | 0.13019                    | 98.77654       |
| 19        | 2.60E-04   | 0.09683                    | 98.87336       |
| 20        | 2.35E-04   | 0.08771                    | 98.96108       |



Table S8: Tests for normality within disease status (iCD/HC). Wilcoxon test between means of Raman intensities at four main peaks of iCD/HC

| Peak<br>(cm <sup>-1</sup> ) | Kolmogorov-Smirnov<br>test |       | Shapiro-Wilk test |       | Wilcoxon<br>test |
|-----------------------------|----------------------------|-------|-------------------|-------|------------------|
|                             | iCD                        | HC    | iCD               | HC    |                  |
| 1110                        | 0.2                        | 0.2   | 0.476             | 0.004 | 0.018            |
| 1298                        | 0.003                      | 0.166 | <0.0001           | 0.454 | <0.0001          |
| 1351                        | 0.068                      | 0.15  | 0.071             | 0.118 | <0.0001          |
| 1623                        | 0.136                      | 0.2   | 0.03              | 0.031 | 0.01             |

Table S9: The combined effects of age, sex (female/male) and disease status (iCD/HC) on the intensities at four main Raman peaks analysed by the generalized linear model

| Peak<br>(cm <sup>-1</sup> ) | Parameter                  | p-value |
|-----------------------------|----------------------------|---------|
| 1110                        | [status iCD] - [status HC] | 0.015   |
|                             | [sex female] - [sex male]  | 0.505   |
|                             | age                        | 0.968   |
| 1298                        | [status iCD] - [status HC] | <0.0001 |
|                             | [sex female] - [sex male]  | 0.518   |
|                             | age                        | 0.998   |
| 1352                        | [status iCD] - [status HC] | 0.005   |
|                             | [sex female] - [sex male]  | 0.939   |
|                             | age                        | 0.723   |
| 1622                        | [status iCD] - [status HC] | 0.001   |
|                             | [sex female] - [sex male]  | 0.367   |
|                             | age                        | 0.583   |

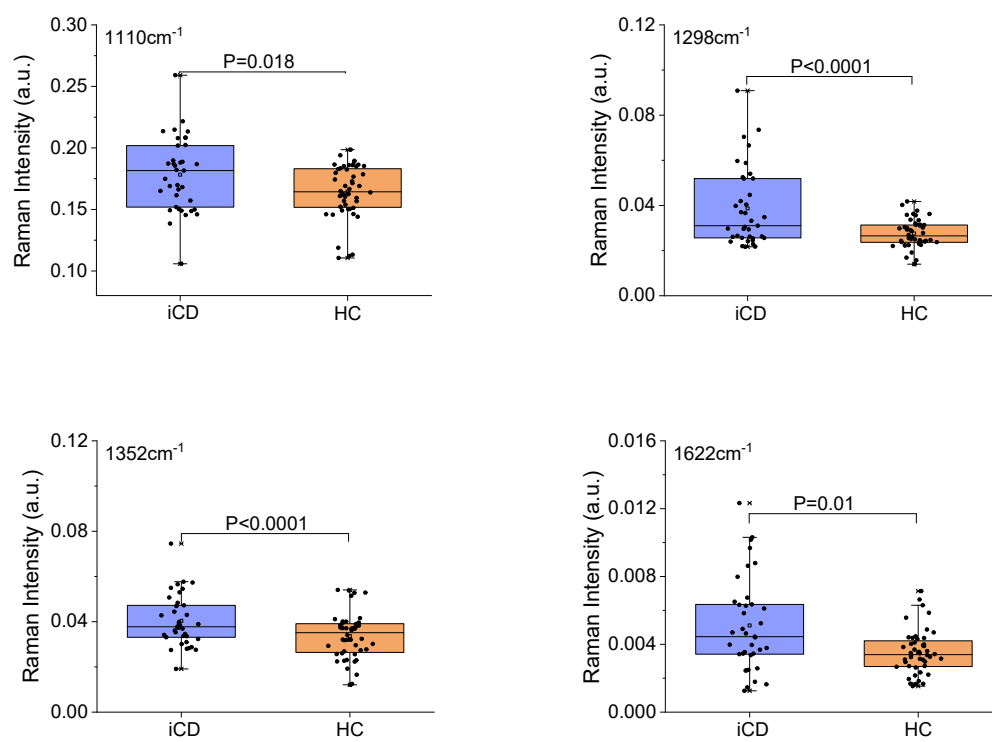

Figure S4: Box plots of the Raman intensities at four main Raman peaks in iCD/HC

Table S10: Eigenvalue, percentage of variance and the cumulative percentage of variance of the first 20 principal components identified by the PCA analysis for iCD/HC

| PC number | Eigenvalue | Percentage of Variance (%) | Cumulative (%) |
|-----------|------------|----------------------------|----------------|
| 1         | 0.08781    | 32.52619                   | 32.52619       |
| 2         | 0.05663    | 20.97624                   | 53.50243       |
| 3         | 0.03602    | 13.34367                   | 66.8461        |
| 4         | 0.02231    | 8.26283                    | 75.10893       |
| 5         | 0.01605    | 5.94714                    | 81.05607       |
| 6         | 0.01285    | 4.75867                    | 85.81474       |
| 7         | 0.00972    | 3.60024                    | 89.41499       |
| 8         | 0.00673    | 2.49329                    | 91.90828       |
| 9         | 0.00486    | 1.80143                    | 93.70971       |
| 10        | 0.00332    | 1.22804                    | 94.93775       |
| 11        | 2.79E-03   | 1.03202                    | 95.96976       |
| 12        | 1.64E-03   | 0.60873                    | 96.5785        |
| 13        | 1.12E-03   | 0.41323                    | 96.99172       |
| 14        | 9.07E-04   | 0.33595                    | 97.32767       |
| 15        | 8.34E-04   | 0.30883                    | 97.6365        |
| 16        | 7.22E-04   | 0.26747                    | 97.90397       |
| 17        | 5.51E-04   | 0.20415                    | 98.10813       |
| 18        | 4.98E-04   | 0.18456                    | 98.29268       |
| 19        | 4.33E-04   | 0.16054                    | 98.45322       |
| 20        | 4.28E-04   | 0.15863                    | 98.61185       |
